# Supplementary material for: Identification of Phosphorylated Calpain 3 in Rat Brain Mitochondria under mPTP Opening
Source: MDPI journal article supplement (doi:10.3390/ijms221910613), 2021-09-30
Supplement: s1 [file s1]

| control |         |          | [Ca <sup>2+</sup> ] threshold |         |          |           |
|---------|---------|----------|-------------------------------|---------|----------|-----------|
|         | CAPN3-I | CAPN3-II | CAPN3-III                     | CAPN3-I | CAPN3-II | CAPN3-III |
|         | Bar 1   | Bar 2    | Bar 3                         | Bar 4   | Bar 5    | Bar 6     |
| Mean 1  | 1.275   | 3.899    | 0.1823                        | 1.5154  | 13.4565  | 0.688     |
| Mean 2  | 2.0125  | 4.8628   | 0.1646                        | 2.1455  | 11.8754  | 0.5064    |
| Mean 3  | 2.1455  | 4.3656   | 0.1663                        | 1.9895  | 13.6995  | 0.5341    |

One Way Analysis of Variance All Pairwise Multiple Comparison Procedures (Student-Newman-Keuls Method) :

| Comparison              | Diff of Means | P<0.050 |
|-------------------------|---------------|---------|
| Group 1 vs. Group 2 (*) | 2.565         | Yes     |
| Group 3 vs. Group 2 (*) | 4.205         | Yes     |
| Group 4 vs. Group 5 (*) | 11.127        | Yes     |
| Group 6 vs. Group 5 (*) | 12.434        | Yes     |
| Group 4 vs. Group 1 (#) | 0.0725        | No      |
| Group 5 vs. Group 2 (#) | 8.635         | Yes     |
| Group 6 vs. Group 3 (#) | 0.405         | Yes     |

One Way Analysis of Variance All Pairwise Multiple Comparison Procedures (Student-Newman-Keuls Method) :

|        | Control | Ca <sup>2+</sup> | ALLN   | ALLN+Ca <sup>2+</sup> | calp   | Calp+Ca <sup>2+</sup> |
|--------|---------|------------------|--------|-----------------------|--------|-----------------------|
|        | Bar 1   | Bar 2            | Bar 3  | Bar 4                 | Bar 5  | Bar 6                 |
| Mean 1 | 1.1294  | 1.8982           | 0.6581 | 1.2184                | 2.0671 | 2.5826                |
| Mean 2 | 1.0924  | 1.7916           | 0.8332 | 1.0978                | 2.2094 | 2.6387                |
| Mean 3 | 1.0359  | 1.8098           | 0.5933 | 0.9716                | 2.0182 | 2.7147                |

| Comparison              | Diff of Means | P<0.050 |
|-------------------------|---------------|---------|
| Group 3 vs. Group 1 (*) | 0.391         | Yes     |
| Group 5 vs. Group 1 (*) | 1.012         | Yes     |
| Group 4 vs. Group 2 (*) | 0.737         | Yes     |
| Group 6 vs. Group 2 (*) | 0.812         | Yes     |
| Group 2 vs. Group 1 (#) | 0.747         | Yes     |
| Group 4 vs. Group 3 (#) | 0.401         | Yes     |
| Group 6 vs. Group 5 (#) | 0.547         | Yes     |

One Way Analysis of Variance All Pairwise Multiple Comparison Procedures (Student-Newman-Keuls Method) :

|        | Control | ALLN  | calp  |
|--------|---------|-------|-------|
|        | Bar 1   | Bar 2 | Bar 3 |
| Mean 1 | 360     | 118   | 606   |
| Mean 2 | 335     | 188   | 616   |
| Mean 3 | 311     | 103   | 551   |

| Comparison              | Diff of Means | P<0.050 |
|-------------------------|---------------|---------|
| Group 3 vs. Group 1 (*) | 199.000       | Yes     |
| Group 2 vs. Group 1 (*) | 255.667       | Yes     |
|                         |               |         |
|                         |               |         |
|                         |               |         |
|                         |               |         |

To Fig 5D.

|        | Ca <sup>2+</sup> retention capacity, CRC |       |       | VCa <sup>2+</sup> <sub>in</sub> |        |         | VTPP <sup>+</sup> <sub>in</sub> |       |        |
|--------|------------------------------------------|-------|-------|---------------------------------|--------|---------|---------------------------------|-------|--------|
|        | Control                                  | ALLN  | calp  | Control                         | ALLN   | calp    | Control                         | ALLN  | calp   |
|        | Bar 1                                    | Bar 2 | Bar 3 | Bar 4                           | Bar 5  | Bar 6   | Bar 7                           | Bar 8 | Bar 9  |
| Mean 1 | 200                                      | 130   | 240   | 56.456                          | 29.22  | 90.671  | 0.12                            | 0.07  | 0.27   |
| Mean 2 | 195                                      | 124   | 245   | 58.5541                         | 24.254 | 85.2544 | 0.11                            | 0.058 | 0.2675 |
| Mean 3 | 199                                      | 128   | 255   | 59.556                          | 21.554 | 83.59   | 0.1145                          | 0.065 | 0.2758 |

One Way Analysis of Variance All Pairwise Multiple Comparison Procedures (Student-Newman-Keuls Method) :

| Comparison              | Diff of Means | P<0.050 |
|-------------------------|---------------|---------|
| Group 3 vs. Group 1 (*) | 48.667        | Yes     |
| Group 2 vs. Group 1 (*) | 70.667        | Yes     |
| Group 6 vs. Group 4 (*) | 28.316        | Yes     |
| Group 5 vs. Group 4 (*) | 33.179        | Yes     |
| Group 9 vs. Group 7 (*) | 0.156         | Yes     |
| Group 8 vs. Group 7 *)  | 0.0505        | Yes     |
|                         |               |         |

To Fig 5E.

|        | V <sub>St.2</sub> |       |        | V <sub>St.3</sub> |        |         | V <sub>St.4</sub> |        |        |
|--------|-------------------|-------|--------|-------------------|--------|---------|-------------------|--------|--------|
|        | Control           | ALLN  | calp   | Control           | ALLN   | calp    | Control           | ALLN   | calp   |
|        | Bar 1             | Bar 2 | Bar 3  | Bar 4             | Bar 5  | Bar 6   | Bar 7             | Bar 8  | Bar 9  |
| Mean 1 | 9.123             | 6.305 | 10.53  | 60.642            | 55.5   | 61.672  | 5.167             | 2.562  | 7.259  |
| Mean 2 | 9.45              | 6.124 | 10.67  | 60.6214           | 55.412 | 61.587  | 5.542             | 2.5897 | 7.7885 |
| Mean 3 | 9.478             | 6.254 | 10.722 | 60.754            | 53.55  | 62.0124 | 5.654             | 2.145  | 7.899  |

One Way Analysis of Variance All Pairwise Multiple Comparison Procedures (Student-Newman-Keuls Method) :

| Comparison              | Diff of Means | P<0.050 |
|-------------------------|---------------|---------|
| Group 3 vs. Group 1 (*) | 1.290         | Yes     |
| Group 2 vs. Group 1 (*) | 3.123         | Yes     |
| Group 6 vs. Group 4 (*) | 1.085         | No      |
| Group 5 vs. Group 4 (*) | 1.852         | No      |
| Group 9 vs. Group 7 (*) | 2.194         | Yes     |
| Group 8 vs. Group 7 *)  | 3.022         | Yes     |
|                         |               |         |
